# Supplementary material
Source: Springer Nature journal article supplement (https://www.springermedizin.de/resource/supplementary/13223_2014_510_MOESM2_ESM.pdf/9596688)

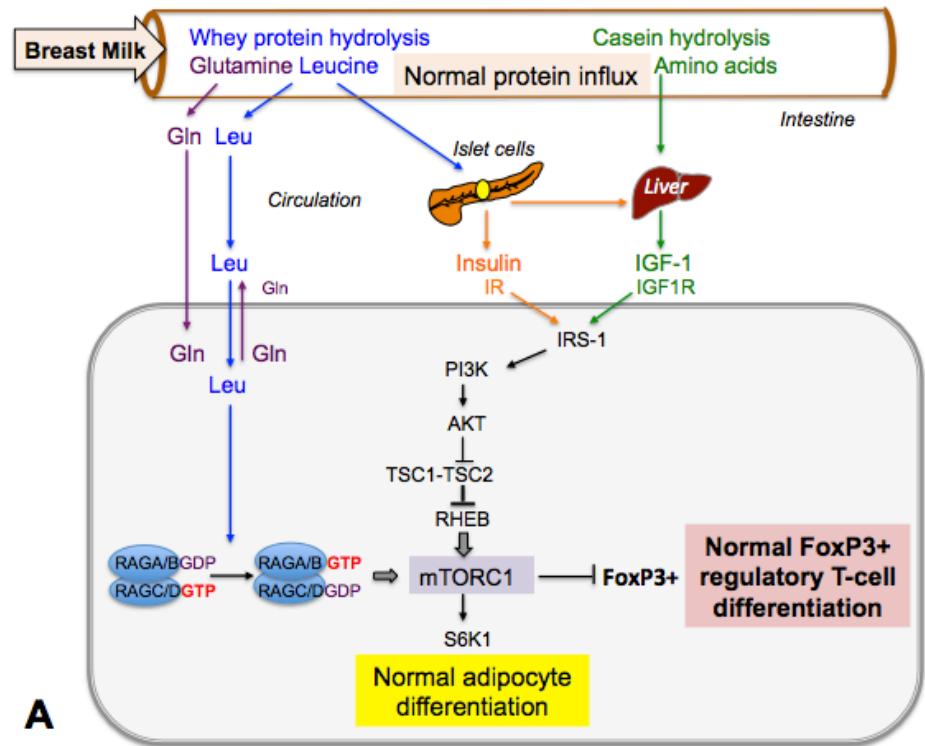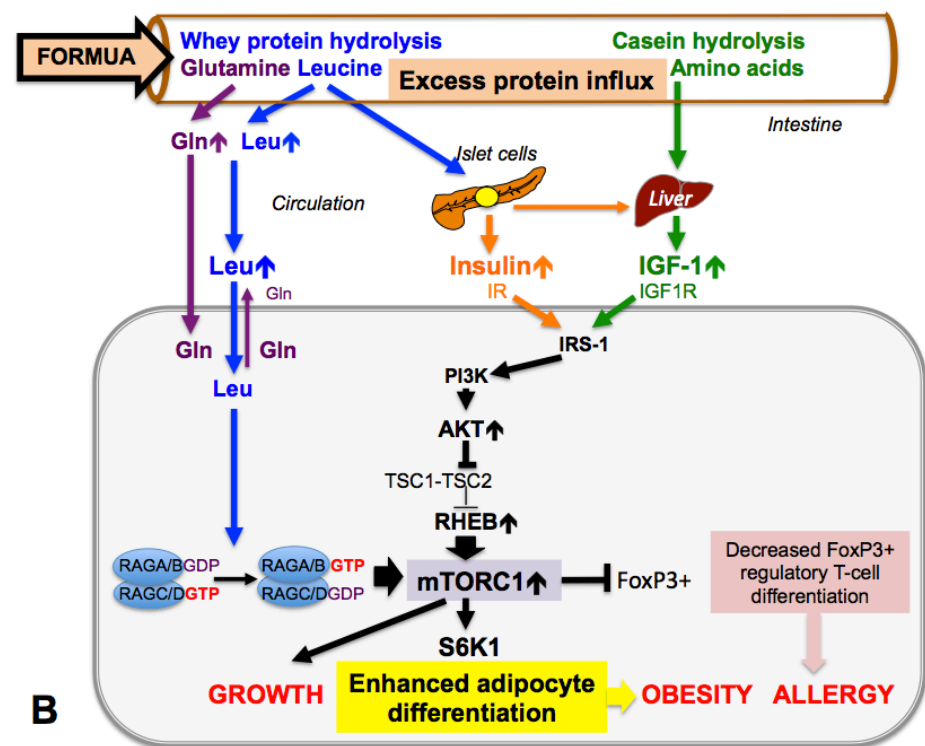

Supplement: MOESM2 [file 9596688]
